# 1 **Biofilms deform soft surfaces and disrupt epithelia.**

2 Alice Cont, Tamara Rossy, Zainebe Al-Mayyah, Alexandre Persat\*

3 Institute of Bioengineering and Global Health Institute, School of Life Sciences, Ecole

4 Polytechnique Fédérale de Lausanne, Lausanne, Switzerland

5 \*alexandre.persat@epfl.ch

## 6 **Abstract**

7 During chronic infections and in microbiota, bacteria predominantly colonize their hosts as  
8 multicellular structures called biofilms. Despite their ubiquity *in vivo*, we still lack a basic  
9 understanding of how they interact with biological tissues, and ultimately how they influence  
10 host physiology. A common assumption is that biofilms interact with their hosts  
11 biochemically. However, the contributions of mechanics, while being central to the process  
12 of biofilm formation, have been vastly overlooked as a factor influencing host physiology.  
13 Specifically, how biofilms form on soft, tissue-like materials remains unknown. Here we show  
14 that biofilms can deform soft substrates by transmission of internally-generated mechanical  
15 stresses. We found that biofilms from both *Vibrio cholerae* and *Pseudomonas aeruginosa*  
16 can induce large deformations of soft synthetic hydrogels. Using a combination of  
17 mechanical measurements and mutants in matrix components, we found that biofilms  
18 deform their substrates by simultaneous buckling and adhesion. Specifically, mechanical  
19 constraints opposing growth causes biofilm buckling, while matrix components maintaining  
20 surface adhesion transmit buckling forces to the substrate. Finally, we demonstrate that  
21 biofilms can generate sufficient mechanical stress to deform and disrupt soft epithelial cell  
22 monolayers, suggesting that these forces can damage a host independently of typical  
23 virulence factors. Altogether, our results illustrate that forces generated by bacterial  
24 communities play an important role not only in biofilm morphogenesis but also in host  
25 physiology, suggesting a mechanical mode of infection.

## 26 **Introduction**

27 In their natural environments, bacteria commonly grow and self-organize into multicellular  
28 structures called biofilms (1). Biofilms form when bacteria attach onto a solid surface and  
29 divide while embedding themselves in a matrix of extracellular polymeric substances (EPS)  
30 (2). The biofilm matrix is a viscoelastic material generally composed of a mixture of  
31 polysaccharides, proteins, nucleic acids and cellular debris (3). EPS maintains cell-cell  
32 cohesion throughout the lifecycle of a biofilm, also making the resident cells more resilient to  
33 selective pressures. The biofilm lifestyle provides resident cells with fitness advantages  
34 compared to their planktonic counterpart, for example by increasing their tolerance to  
35 external chemical stressors such as antimicrobials and host immune effectors. In addition,  
36 its mechanical strength and cohesion promotes biofilm integrity against physical challenge  
37 such as flow and grazing (4).

38 Bacteria commonly colonize the tissues of their host in the form of biofilms. For example,  
39 biofilms are a common contributor of infections, for example in cystic fibrosis patients who  
40 are chronically infected by biofilms of the opportunistic pathogen *P. aeruginosa* (5, 6).  
41 Biofilms are also widespread in microbiota, for example as commensals seek to stably  
42 associate to host intestinal epithelium (7). As they grow on or within a host, biofilms must  
43 cope with a battery of chemical and physical stressors. In particular, they must inevitably  
44 form at the surface of soft biological material composed of host cells or extracellular matrix  
45 (ECM). Despite host-associated biofilms ubiquitously forming on soft surface, we still lack a  
46 rigorous understanding of how the mechanical properties of a substrate impacts the  
47 physiology of a biofilm, and reciprocally how biofilms impact the mechanics of soft biological  
48 surfaces.

49 The growth of single cells embedded within self-secreted EPS drives biofilm formation.  
50 During this process, cells locally stretch or compress the elastic matrix, thereby exerting  
51 mechanical stress (8, 9). This local action at the level of single cells collectively generates  
52 mechanical stress across the whole biofilm structure. Thus, the combination of biofilm

53 growth and matrix elastic properties imposes the generation of internal mechanical stress  
54 (10). As a consequence of this stress, bacterial colony biofilms form folds and wrinkles when  
55 growing on agar plates or at an air-liquid interface (11, 12). These mechanics also influences  
56 the spatial organization of single cells within *V. cholerae* immersed biofilms (13, 14). Internal  
57 mechanical stress can also arise by a combination of cell-surface adhesion and growth,  
58 influencing the architecture of submerged biofilms and microcolonies. Friction force between  
59 the microcolony and the surface opposes biofilm expansion, generating an inward internal  
60 stress that leads to a buckling instability verticalizing or reorienting contiguous cells (14, 15).  
61 These studies demonstrate the importance of mechanics in biofilm morphogenesis and  
62 spatial organization, but their function in the context of host colonization remains unknown.

63 Here, we investigate how biofilms form at the surface of soft material whose mechanical  
64 properties replicate the ones encountered *in vivo*. We show that biofilms from the model  
65 pathogens *V. cholerae* and *P. aeruginosa* can deform soft synthetic hydrogel substrates they  
66 grow on. By spatially and quantitatively measuring substrate morphology, we propose a  
67 model where biofilms buckle to initiate deformations. Using EPS matrix mutants we  
68 demonstrate that deformations of the substrate require EPS matrix components maintaining  
69 cell-cell cohesion and cell-surface adhesion. The magnitude of the deformations depends on  
70 the stiffness of the material in a range that is consistent with host properties. Using traction  
71 force microscopy, we show that biofilms can generate large mechanical stress in the MPa  
72 range. Finally, we demonstrate that biofilms can deform and even damage tissue-  
73 engineered soft epithelia whose mechanics reproduce the ones of a host-tissue. These  
74 insights suggest that forces generated by growing biofilms could play a role not only in  
75 biofilm morphomechanics, but also in mechanically compromising the physiology of their  
76 host.

## 77 **Results**

### 78 **Biofilms deform soft substrates**

79 To understand how biofilms interact with soft surfaces, we first explored their formation on  
80 synthetic hydrogel substrates. We generated polyethylene glycol (PEG) hydrogel films via  
81 photoinitiated polymerization of PEG diacrylate precursors at the bottom surface of  
82 microfluidic channels. These polymeric films are covalently bound to the glass surface to  
83 avoid drift and delamination. By using a “sandwich” method for polymerization, we could  
84 fabricate flat ~100  $\mu\text{m}$ -thin PEG films that allowed us to perform high resolution live confocal  
85 imaging of biofilm formation under flow (Fig. 1A). We used the *V. cholerae* A1152 strain (*V.*  
86 *cholerae* WT\*) which constitutively produces large amounts of EPS matrix, thereby  
87 generating robust and reproducible biofilms. On soft hydrogels, *V. cholerae* formed biofilms  
88 whose bottom surfaces appeared bell-shaped (Fig. 1B), in striking difference with the  
89 typically flat-bottom biofilms that form on hard surfaces such as glass and plastic. To  
90 distinguish whether this shape was a result of the deformation of the hydrogel or of the  
91 detachment of the biofilm from the surface, we embedded fluorescent tracer particles within  
92 the hydrogel film by mixing them with the pre-polymer solution before the cross-linking step.  
93 We could observe that the fluorescent tracer particles filled the apparent bell-shaped void at  
94 the biofilm core and that the hydrogel surface and the biofilm remained in contact (Fig. 1C).  
95 This demonstrates that the soft hydrogel substrate deforms under *V. cholerae* biofilms.

96 We then wondered whether these deformations were specifically induced by *V. cholerae*  
97 or could represent a common feature of biofilms across species. To answer this, we tested  
98 whether *P. aeruginosa* biofilms could deform soft hydrogels. We found that biofilms of *P.*  
99 *aeruginosa* *wspF* mutant (*P. aeruginosa* WT\*), which constitutively produces large amounts  
100 of EPS matrix, could similarly deform soft PEG hydrogels (Fig. 1D-E), and so did wild-type  
101 (Fig. S1). In summary, *V. cholerae* and *P. aeruginosa*, two model biofilm-forming species  
102 with distinct EPS composition are both able to deform soft substrates. This is consistent with  
103 a mechanism where biofilms generate mechanical stress on the material they grow on.

## 104 **Biofilm deform soft substrates after reaching a critical diameter**

105 How could biofilms mechanically deform their substrates? Given the influence of growth-  
106 induced internal mechanical stress on biofilm morphology and architecture, we hypothesized  
107 that biofilms could deform soft substrates by transmission of internal stresses to the  
108 substrate they grow on. To test this hypothesis, we performed dynamic visualizations of the  
109 deformations of the hydrogel film as biofilms grew. To obtain an accurate deformation  
110 profile, we performed a radial re-slicing and averaging around the biofilm center. We could  
111 thus extract the deformation profile  $\delta$ , its maximum deformation amplitude  $\delta_{max}$  and full-  
112 width at half maximum  $\lambda$  (Fig. 2A). We thus recorded surface profiles for many biofilms. By  
113 reconstructing hydrogel surfaces for biofilms of different sizes, we found that  $\delta_{max}$  and  $\lambda$   
114 linearly scaled with the diameter  $d$  of the biofilm (Fig. S2), indicating that biofilm expansion  
115 promotes surface deformation.

116 We went further and dynamically tracked these deformations for single biofilms.  
117 Deformations increased as biofilms grew, even displaying a slight recess near the biofilm  
118 edges (Fig. 2B-C, Movie S1). In these visualizations, we noticed that there was a lag  
119 between the increase in biofilm diameter and the onset of deformation, with a finite  
120 deformation only appearing after 7 h of growth. This was further confirmed by following the  
121 deformations generated by many biofilms. Measurable morphological changes of the surface  
122 appeared after 6 to 7 h of growth (Fig. 2D). Rescaling these measurements with the  
123 diameter of the biofilm collapsed  $\delta_{max}$  measurements, highlighting a critical biofilm diameter  
124 (35  $\mu\text{m}$ ) above which deformations emerged (Fig. 2E). The existence of a critical diameter is  
125 reminiscent to buckling instabilities of rigid bodies subject to compressive stress, as in Euler  
126 buckling.

## 127 **Biofilms push their substrate in the growth direction**

128 To further investigate the mechanism by which biofilms deform surfaces, we quantified the  
129 hydrogel substrate strain during growth. To achieve this, we tracked the displacements of

130 the fluorescent tracer particles embedded within the hydrogel in 3D using a digital volume  
131 correlation algorithm (16). At the early stages of hydrogel deformation, we found that in the  
132 plane defined by the initial surface at rest, the particles under the biofilm move in the  
133 direction of growth. Thus, the strain field shows that the biofilm stretches its substrate  
134 radially in the outward direction in addition to vertical deformations (Fig. 3A and Fig. S3). In  
135 other words, a biofilm applies an in-plane stress on the substrate in its growth direction,  
136 which is most likely generated by a friction between the biofilm and the surface (14, 15). As  
137 a result, the elastic biofilm experiences a force in the opposite direction, towards its center.  
138 In summary, the opposition between biofilm growth and friction with the surface generates  
139 an internal mechanical stress within the biofilm oriented radially, towards its center.

#### 140 **EPS drives biofilm and substrate deformations**

141 We then wondered how mechanical properties of biofilms influence substrate deformations.  
142 To investigate their contributions, we used *V. cholerae* EPS matrix mutants with altered  
143 biofilm structure and mechanical properties. The *V. cholerae* matrix is mainly composed of a  
144 polysaccharide (*vps*) and proteins including Rbma, an extracellular component which  
145 specifically strengthens cell-cell cohesion and stiffens the matrix (17, 18). We found that  
146 biofilms of *rbmA* deletion mutants were unable to deform the hydrogel substrate,  
147 demonstrating that cell-cell cohesion is an essential ingredient in force generation (Fig. 3B).  
148 In *P. aeruginosa*, the polysaccharides Pel and Psl, and the protein CdrA play partially  
149 redundant functions in maintaining elastic properties of the biofilm (19–21). In a similar  
150 manner, we found that the deformations generated by *P. aeruginosa* mutants in these matrix  
151 components are decreased compared to WT\*, but are not abolished (Fig. 3C). Specifically,  
152 deletion mutants in *psl*, *pel* and *cdrA* showed a decrease in deformation amplitude, further  
153 demonstrating that mechanical cohesion plays a key role in surface deformation (Fig. 3C-D).  
154 We observed the strongest decrease in deformation for deletion mutants in *pel*.

155 We then probed the function of adhesion of the biofilm with the surface by visualizing the  
156 deformations generated by a *V.cholerae bap1* deletion mutant. Bap1 is specifically secreted  
157 at the biofilm-substrate interface to maintain proper surface attachment (18). The *bap1*  
158 mutant formed biofilms that did not deform the surface. However, it produced biofilms that  
159 were slightly bent but which delaminated from the substrate, thereby creating a gap between  
160 the biofilm and the hydrogel, indicating that it may have buckled (Fig. 3B). Our observations  
161 of the *bap1* mutant show that adhesion transmits mechanical stress generated by buckling  
162 from the biofilm to the substrate. Due to the redundant functions of its EPS components, we  
163 could not produce *P. aeruginosa* mutants with altered surface adhesion properties.  
164 However, *P. aeruginosa* biofilms growing on hydrogels with large Young's modulus  
165 delaminated. This highlight that the transition between deformed and delaminated substrate  
166 depends on the relative contribution of adhesion strength and substrate elasticity (Fig. S6).  
167 In summary, cell-cell mechanical cohesion is essential in generating the internal stress that  
168 promotes biofilm buckling, while cell-substrate adhesion transmits this stress to the  
169 underlying substrate (Fig. 3E).

170

### 171 **Biofilms generate large traction forces**

172 Biofilms thus deform soft materials by combining of growth-induced buckling and adhesion  
173 to their substrate. Could the mechanical stress generated on the substrate also impact  
174 various types of biological surfaces? To first explore this possibility, we quantified the forces  
175 exerted by the biofilm on hydrogel films. We used our previous particle tracking data to  
176 perform traction force microscopy, thereby computing the stress field and surface forces  
177 applied by the biofilm on the hydrogel. Traction forces were surprisingly large, reaching  
178 5 MPa at the biofilm center after 12 h of growth (Fig. 4A). We note that the magnitude of the  
179 stress is relatively large, reaching the value of typical turgor pressure which in essence  
180 drives biofilms growth and stretching (22). In comparison, epithelial cell-cell junctions break

181 when experiencing a few kPa (23). Therefore, we anticipate that biofilms produce sufficient  
182 force to mechanically deform and potentially dismantle epithelia.

183 Given the large forces generated by biofilms on hydrogel substrates, we wondered to  
184 which extent they could deform biomaterials of different stiffnesses as defined by their  
185 Young's modulus. To test this, we reproduced the mechanical properties of various tissue  
186 types by tuning the stiffness of the PEG hydrogel films between 10 kPa and 200 kPa (24,  
187 25). The stiffest hydrogels only slightly deformed (Fig. 4B,  $\delta_{max} = 5 \mu\text{m}$  for  $E = 203 \text{ kPa}$ ). In  
188 contrast, biofilms growing on the softest hydrogels displayed large deformations  
189 ( $\delta_{max} = 27 \mu\text{m}$  for  $E = 12 \text{ kPa}$ ). The rate of increase of deformations was inversely  
190 correlated with stiffness, resulting in differences in  $\delta_{max}$  between colonies of identical  
191 diameter growing on substrates with distinct stiffnesses (Fig. 4C). For each stiffness, the  
192 deformation amplitude  $\delta_{max}$  and the width  $\lambda$  increased linearly with biofilm diameter (Fig. 4C  
193 and Fig. S4). Rescaling  $\delta_{max}$  with the biofilm diameter highlights a power-law relationship  
194 between deformation and substrate stiffness qualitatively consistent with the theory of  
195 buckling of plates coupled to an elastic foundation (Fig. S5)(26).

## 196 **Biofilms deform and disrupt epithelial cell monolayers**

197 Given the ability of biofilms to generate large forces and to deform materials across a wide  
198 stiffness range, we wondered whether they could disrupt soft epithelium-like tissues. To test  
199 how biofilms can mechanically perturb host tissue during colonization, we engineered  
200 epithelial cell monolayers at the surface of soft extracellular matrix. Such cell-culture system  
201 replicates the mechanical properties of host epithelia including tissue stiffness and adhesion  
202 to underlying ECM. As a result, it constitutes a more realistic host-like environment  
203 compared to cell monolayers grown on plastic or glass. We thus engineered epithelial  
204 monolayers of enterocyte-like Caco-2 cells on a soft extracellular matrix composed of  
205 Matrigel and collagen (Fig. 5A). This produced soft and tight ECM-adherent epithelia. We  
206 seeded the surface of these epithelia with *V. cholerae* WT\*. We note that the WT\* strain has  
207 reduced virulence compared to WT *V. cholerae* due to its constitutively high levels of cyclic-



208 di-GMP which decreases the expression of virulence factors to promote the biofilm state  
209 (27). *V. cholerae* biofilms formed at the epithelial surface within 20 h (Fig. 5B). Overall,  
210 biofilms perturbed the shape of the epithelium. Under biofilms, the cell monolayer detached  
211 from its ECM substrate and was often bent as did synthetic hydrogel films (Fig. 5B-ii). More  
212 surprisingly, we also observed that Caco-2 cell monolayers lost cohesion and single cells  
213 were engulfed by the biofilm. This allowed the biofilm to breach the epithelium and reach the  
214 ECM. There, biofilms deformed the ECM substrate, turning the initially flat surface into a  
215 dome-like shape as our synthetic hydrogels did (Fig. 5B-iv). These disruptions did not  
216 depend on host cell type as *V. cholerae* could also damage and bend monolayers of MDCK  
217 cells which has strong cell-cell junctions (Fig. 5C) (28). Our observations suggest that  
218 biofilms apply mechanical forces on host tissue thereby perturbing the morphology and  
219 integrity of epithelia, as well as its underlying ECM.

## 220 **Discussion**

221 We demonstrated that biofilms can deform the surface of soft materials they grow on. We  
222 observed that both *V. cholerae* and *P. aeruginosa* generate these deformations, suggesting  
223 that it is a feature of biofilm growth and is not species-dependent. We identified key physical  
224 and biological components that enable these deformations. In particular, our measurements  
225 of hydrogel deformations provide evidence consistent with a mechanism where the biofilm  
226 buckles as it develops. This mechanism is reminiscent of Euler buckling where the internal  
227 compressive stress in a beam triggers an instability that induces transverse deformations. In  
228 our case, we found that the onset of the buckling instability depends on growth under  
229 mechanical constraint which generates a buildup of compressive stress. In-plane hydrogel  
230 strain measurements indicate a friction between the surface and the expanding biofilm,  
231 which promotes buildup of internal stress. Also, the fact that biofilms of the *V. cholerae* *rbmA*  
232 and *P. aeruginosa* EPS genes deletion mutants have reduced or abolished ability to buckle  
233 or to deform the surface indicates that cell-cell cohesion in the biofilm may also participate in

234 mechanical constraint. Without cell-cell cohesion and matrix elastic property, the viscous  
235 biofilm would flow, dissipating mechanical stress and eluding the elastic instability.

236 These two contributions, biofilm-surface friction and matrix elasticity, induce a buildup of  
237 compressive stress within the biofilm, ultimately causing buckling. The facts that the onset of  
238 deformation occurs at a finite critical biofilm diameter and that the width of the deformation  $\lambda$   
239 scales linearly with this diameter are consistent with an Euler-type buckling instability (29).  
240 Also, the slight negative deformations (recess) observed near the edge of larger biofilms is  
241 reminiscent of higher order buckling modes. Finally, the absence of hydrogel deformations in  
242 biofilms from the *V. cholerae* *bap1* mutant shows that adhesion helps transmit the  
243 transversal forces (normal to the surface) generated during buckling to the hydrogel. In  
244 addition, the fact that for stiffer substrates *V.cholerae* and *P.aeruginosa* respectively deform  
245 and delaminate from the substrate demonstrate the important balance between adhesion  
246 and substrate elasticity in this phenomenon (30). Thus, biofilms mechanically shape their  
247 environment via a buckling-adhesion mechanism, reminiscent of the buckling and wrinkling  
248 of plates and films on elastic foundations (26).

249 Internal stress generated by bacterial expansion under physical constrains influences the  
250 morphologies of colony biofilms, forming wrinkles, folds and blisters. These colonies shapes  
251 are also caused by a buckling/wrinkling-like instability which depends on the mechanical  
252 properties of the matrix. These mechanically-generated shapes have been observed in *V.*  
253 *cholerae*, *P. aeruginosa*, *Bacillus subtilis* and *E. coli* and have been instrumental as an  
254 obvious phenotype to identify components and regulators of the biofilm matrix and to  
255 characterize the mechanics driving multicellular growth (31–35). However, the impact of  
256 these macroscale morphological changes and internal mechanics on the physiology of  
257 resident microbes have yet to be identified. Immersed, micrometer scale biofilms that are  
258 commonly found in natural microbial niches also undergo architectural transitions due to the  
259 emergence of internal mechanical stress. For example, cell-cell cohesion coupled with  
260 growth participates in the alignment of single cells within the multicellular structure (36). In

261 addition, a buckling instability causes *V. cholerae* cell verticalization in the initial step of  
262 biofilm formation, in a mechanism that depends on friction of single cells with their glass  
263 substrate, generating compressive mechanical stress (14). Single cells in *E. coli*  
264 microcolonies reorient through a similar mechanism (15). The physiological functions of  
265 these cellular rearrangements have however not yet been identified. The buckling-adhesion  
266 model we here propose is consistent with the mechanics of immersed and colony biofilms.  
267 Our observations suggest that internal mechanical stress can have a function in the  
268 interaction between the biofilm and its surrounding environment, influence the morphology  
269 and mechanics of its material substrate. This may result in fouling of abiotic surfaces, in  
270 damaging competing biofilms or even host tissues.

271 Despite being widespread in the environments of microbes, the influence of substrate  
272 rigidity is generally overlooked in studies of surface attachment and biofilm formation (37–  
273 39). Using a materials approach aimed at reproducing a host-like environment, we found  
274 that substrate mechanical properties have a strong impact on biofilm development. Biofilm-  
275 induced deformations are particularly relevant when considering their growth at the surface  
276 of soft biological tissues. We demonstrated that biofilms generate large forces, and that  
277 these forces can be transmitted to underlying epithelia. In response, we observed that  
278 epithelial monolayers delaminate from their ECM and subsequently bend. The biofilm-  
279 generated forces also disrupt epithelial monolayers. Consistent with this, traction force  
280 microscopy measurements show that biofilms can generate MPa surface stress, which is  
281 larger than the strength of epithelial cell-cell junctions that typically rupture under the kPa  
282 range (40). In summary, our visualizations in tissue-engineered epithelia and on hydrogel  
283 films suggest that biofilms could mechanically damage host tissues when growing *in vivo*.  
284 Consistent with this hypothesis, many biofilms are known to cause tissue lesions. For  
285 example, the urine of vaginosis patients contains desquamated epithelial cells covered with  
286 biofilms (41, 42). Commensal biofilms form scabs at the epithelial surface of honeybee's gut,  
287 triggering immune responses (43). Epithelial integrity is also compromised in intestinal

288 diseases such as inflammatory bowel disease in a process that highly depends on the  
289 composition of the microbiota (44). Finally, hyper-biofilm forming clinical variants of *P.*  
290 *aeruginosa* cause significant damage to the surrounding host tissue despite its reduced  
291 virulence (45). Mechanical interactions between bacterial collectives and their host may thus  
292 represent an overlooked contributor of infections, colonization and dysbiosis. Further  
293 investigations will address whether non-pathogenic biofilm-forming species can induce  
294 epithelial damage and in fact contribute to chronic inflammation.

295 Most studies of biofilm formation have so far focused on their internal organization and  
296 mechanics and on the genetic regulation of matrix production. How biofilms physically  
297 interact with their natural environments has been however vastly unexplored, but is  
298 necessary knowledge to generate a holistic understanding of host-microbe interactions. This  
299 will require the development of innovative techniques that can reproduce physical  
300 components of the natural environments of biofilm-forming species in the lab such as the  
301 ones presented here.

302 **Acknowledgements**

303 We would like to thank the Fitnat Yildiz, Matt Parsek, Melanie Blokesch and Bonnie Bassler  
304 for strains and plasmids and John Kolinski and Pedro Reis for discussions.

305

306 **Funding**

307 This work was supported by the Swiss National Science Foundation Projects Grant  
308 31003A\_169377, the Gabriella Giorgi-Cavaglieri Foundation, the Gebert R uf Stiftung and the  
309 Fondation Beytout.

310

311 **Competing interests**

312 None

313

314

315

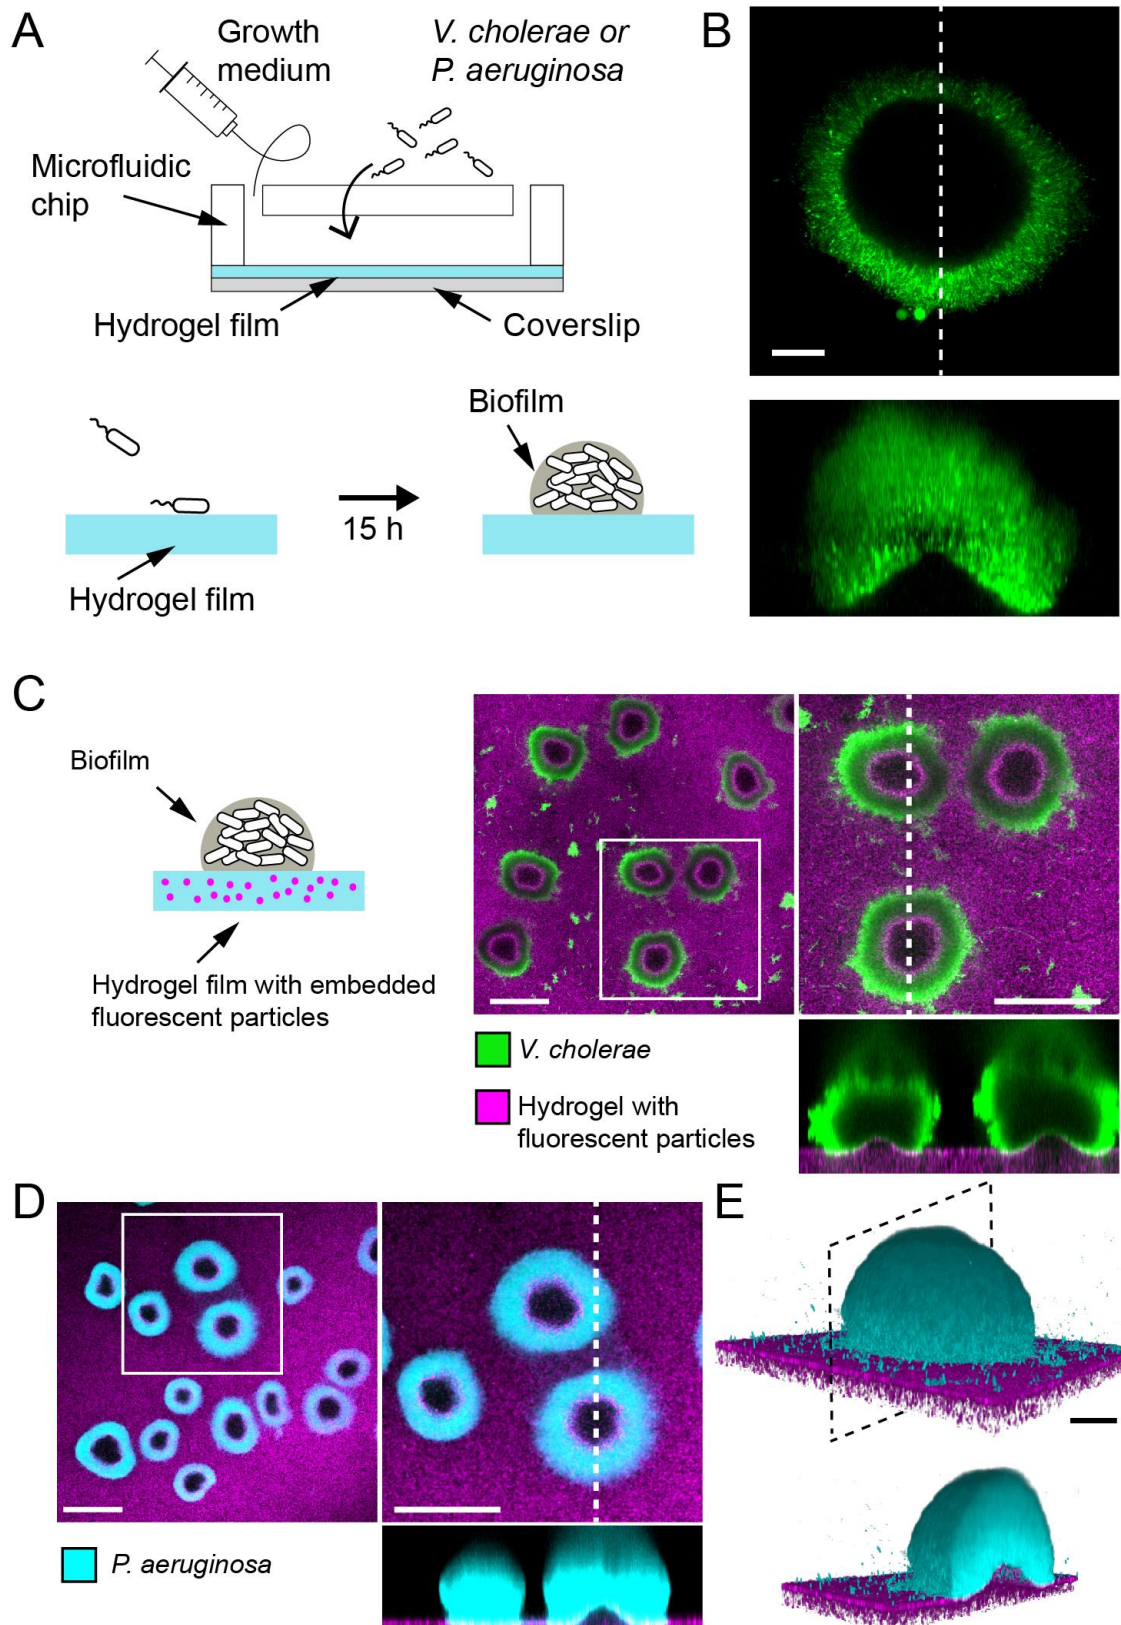

316

317 **Fig. 1: Biofilms deform soft substrates.** (A) Illustration of experimental setup where we  
318 generate thin hydrogel films at the bottom surface of microchannels. These devices allow us

319 to study biofilm formation on hydrogels reproducing mechanical properties of host tissues.  
320 (B) In-plane and cross-sectional confocal visualizations show that *V. cholerae* biofilms  
321 growing on hydrogels display large gaps at their core. (C) Embedding fluorescence tracer  
322 particle in the hydrogel films allow for visualization of deformations. *V. cholerae* biofilms  
323 formed at the surface of the films deform the substrate. (D) *P. aeruginosa* biofilms similarly  
324 deform the soft substrates. Hydrogel elastic modulus: (B and C)  $E = 12$  kPa, (D and E)  $E =$   
325 38 kPa. Scale bars: (C and D) 100  $\mu\text{m}$ , (B and E) 20  $\mu\text{m}$ .

326

327

328

329

330

331

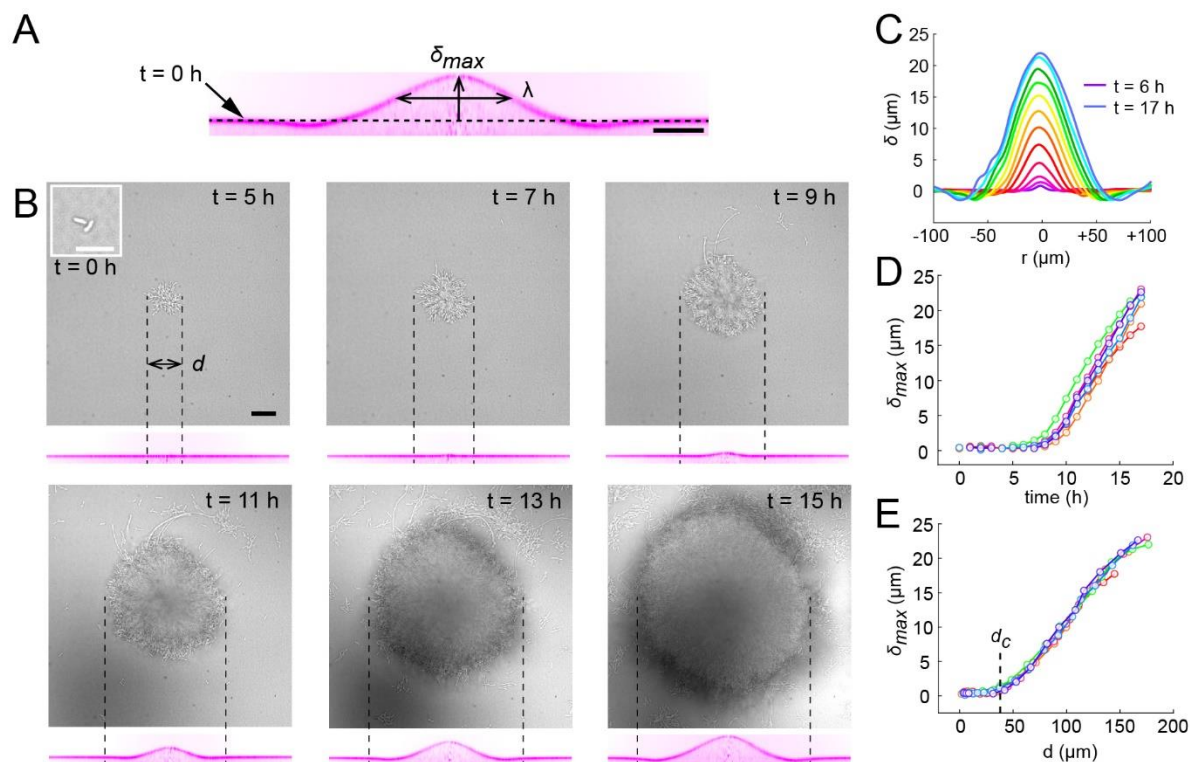

332

333

334 **Fig. 2: Substrate deformation dynamics highlight a critical biofilm diameter. (A)**

335 Morphological parameters  $\delta_{max}$  (maximum deformation amplitude) and  $\lambda$  (half max full

336 width) computed from resliced deformation profiles. Dashed line indicates the baseline

337 position of the gel surface. (B) Timelapse visualization of *V. cholerae* biofilm growth

338 (brightfield, top) with deformation (reslice, bottom). Dashed lines indicate biofilm position and

339 size on the corresponding hydrogel profile. (C) Superimposition of these profiles shows the

340 rapid deformation and the emergence of a recess at biofilm edges. Each color corresponds

341 to the same biofilm at different times. (D) Time evolution of  $\delta_{max}$  shows a rapid increase

342 after 6 to 7 h of growth. (E) The dependence of  $\delta_{max}$  on biofilm diameter highlights a critical

343 biofilm diameter  $d_c$  above which deformation occurs. For D and E each line color

344 corresponds to a different biofilm. Scale bar: 10  $\mu\text{m}$  for inset  $t = 0$  h in (B), else 20  $\mu\text{m}$ .

345

346



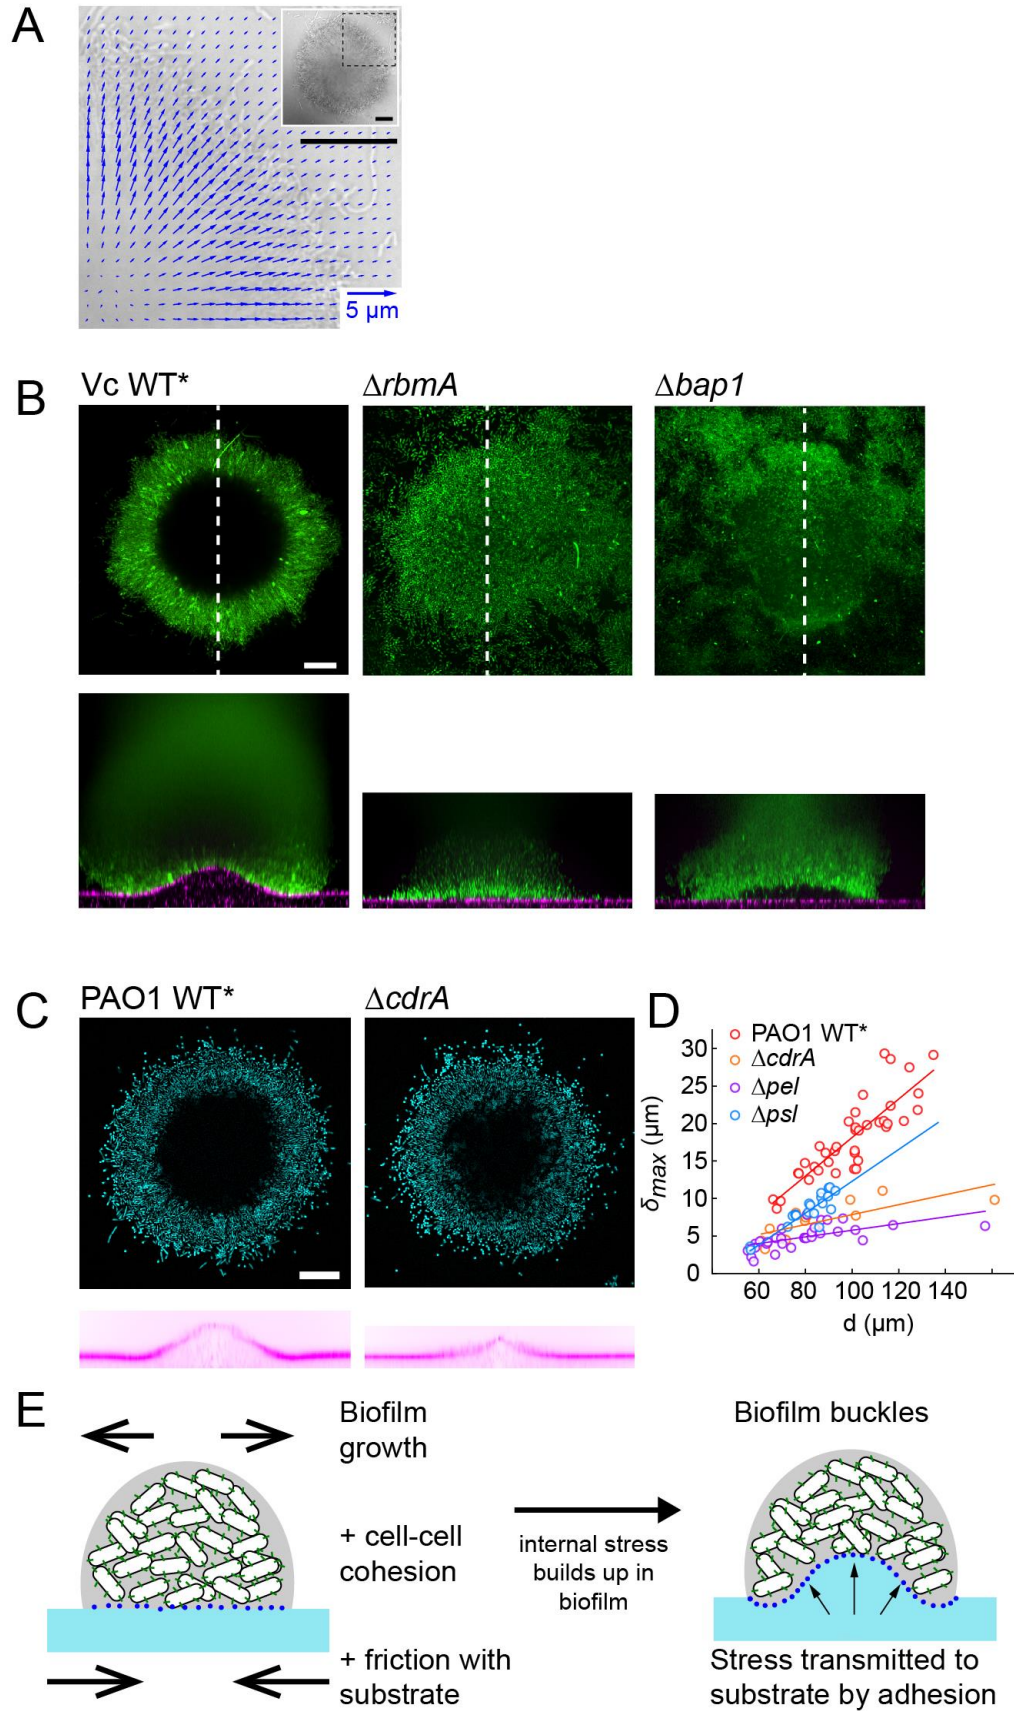

347  
348

349 **Fig. 3: Biofilms deform their growth substrate by buckling.** (A) Hydrogel strain field  
350 computed by digital volume correlation between 11 h and 12 h of growth. We superimposed  
351 the vector strain field with a brightfield image of the biofilm. For visualization purposes we only  
352 display data for the top right quarter of the biofilm shown in inset (dashed lines). (B)  
353 Deformations of hydrogel substrates by *V. cholerae* WT\*, *rbmA*<sup>-</sup> and *bap1*<sup>-</sup> biofilms. Biofilms  
354 formed by *rbmA*<sup>-</sup> and *bap1*<sup>-</sup> fail to deform the substrate. *bap1*<sup>-</sup> biofilms delaminate from the  
355 hydrogel surface. (C) Comparison of hydrogel deformations by *P. aeruginosa* WT\* and *cdrA*<sup>-</sup>  
356 biofilms. (D) Dependence of maximum deformations on *P. aeruginosa* WT\*, *cdrA*<sup>-</sup>, *pet* and  
357 *psf* biofilm diameter. All matrix mutants tend to generate weaker deformations compared to  
358 WT\*. (E) A model for the mechanism of biofilm deformation of soft substrates. Buildup of  
359 mechanical stress in the biofilm induces buckling. Adhesion between the biofilm and the  
360 surface transmits buckling-generated stress to the hydrogel, inducing deformations. Scale  
361 bars: 20 μm.

362  
363

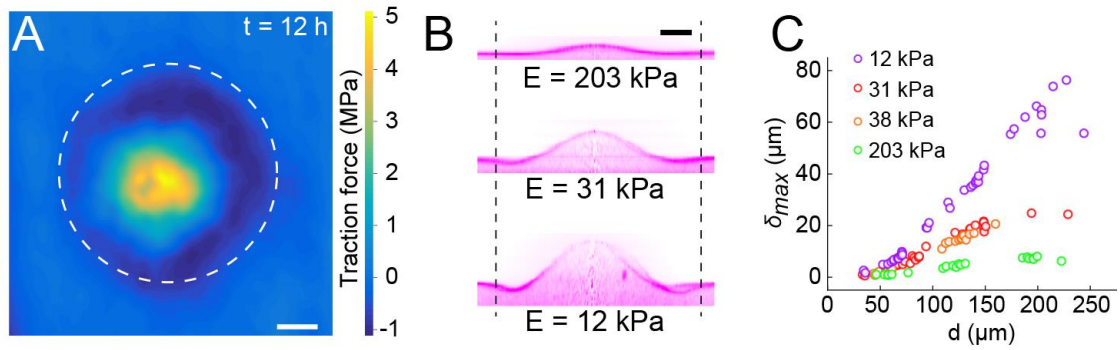

364

365 **Fig. 4: Biofilms generate large traction forces.** (A) Traction force microscopy  
366 measurements at the hydrogel-biofilm interface. The dashed line shows the edge of the  
367 biofilm. Traction force is largest at the biofilm center, reaching 5 MPa. (B) Deformation  
368 profiles generated by *V. cholerae* biofilms of equal diameters on three hydrogels with  
369 different stiffness. (C) Biofilm diameter-dependence of maximum deformation for four  
370 different hydrogel composition representing a typical range of tissue stiffnesses. The softest  
371 hydrogel can deform up to 80  $\mu\text{m}$  for a biofilm diameter of 220  $\mu\text{m}$ . Scale bar: 20  $\mu\text{m}$ .

372

373

374

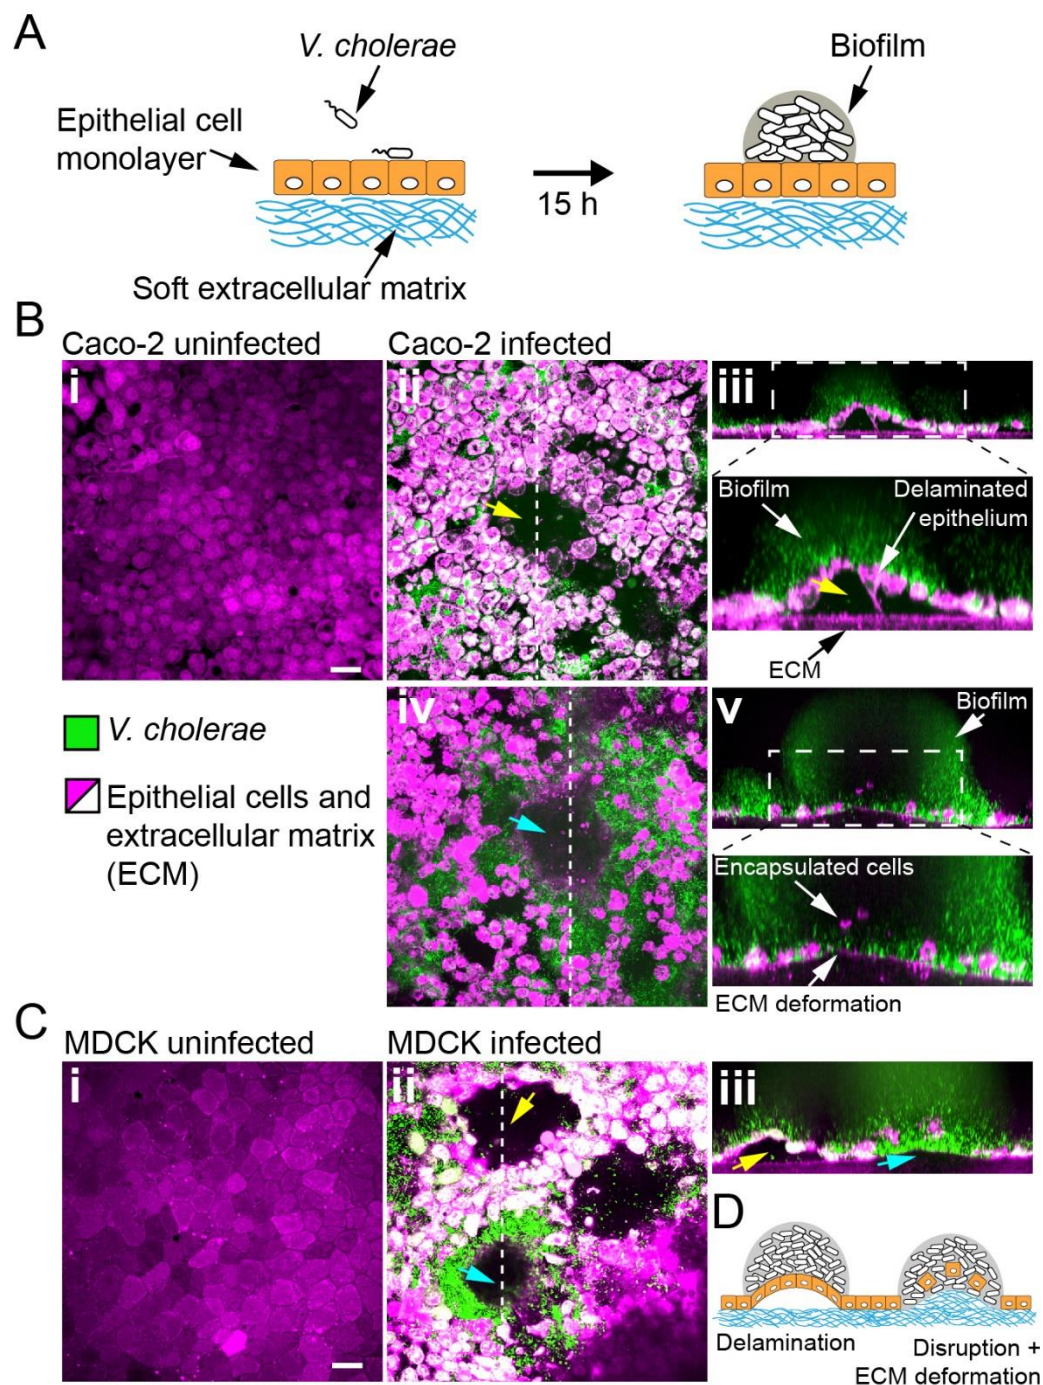

375

376 **Fig. 5: Biofilms deform and disrupt epithelial cell monolayer.** (A) Caco-2 and MDCK  
 377 cells grow at the surface of a soft ECM into a tight monolayer on which we seed a liquid  
 378 inoculum of *V. cholerae*. (B) Confocal images of uninfected (i) and infected (ii-v) monolayers  
 379 of Caco-2 cells. Yellow arrow indicates gaps in the epithelial monolayer (ii and iii), blue arrow  
 380 shows deformed ECM (iv). (C) Confocal images of uninfected (i) and infected (ii-iii)

381 monolayers of MDCK cells, also showing delamination and rupture as illustrated in (D).

382 Scale bars: 20  $\mu\text{m}$ .

383

## 384 **Methods**

385

### 386 **Cell culture**

387 Caco-2 cells and MDCK cells were maintained in T25 tissue culture flasks (Falcon) with  
388 DMEM medium (Gibco) supplemented with 10% fetal bovine serum at 37°C in a CO<sub>2</sub>  
389 incubator.

390

### 391 **Cell culture on collagen/Matrigel gels**

392 To resemble the extracellular matrix natural niche, we cultured epithelial cells at the surface  
393 of collagen and Matrigel based hydrogels. Hydrogel solutions were prepared on ice to avoid  
394 premature gelation by mixing 750 µl of neutralized collagen with 250 µl of growth-factor  
395 reduced Matrigel matrix (Corning, 356231). The neutralized collagen was obtained by mixing  
396 800 µl of native type I collagen isolated from the bovine dermis (5mg/ml, Cosmo Bio Co.,  
397 Ltd.) with 10 µl of NaHCO<sub>3</sub> (1 M), 100 µl of DMEM-FBS and 100 µl of DMEM 10X. We then  
398 spread 100 µl of the hydrogel solution in glass bottom dishes (**P35G-1.5-20-C, MatTek**),  
399 which were kept on ice. Excess solution was removed from the sides of the well to avoid the  
400 formation of a meniscus. To promote collagen adhesion, the wells were previously  
401 functionalized with a 2% polyethyleneimine solution (Sigma-Aldrich) for 10 min and a 0.4%  
402 glutaraldehyde solution (Electron Microscopy Science) for 30 min. We finally placed the  
403 coated dishes at 37°C in a CO<sub>2</sub> incubator for 20 minutes to allow gelation.

404 MDCK and Caco-2 cells were detached from the flask using trypsin (Sigma-Aldrich). We  
405 seeded the cells at a concentration of 1000 cells/mm<sup>2</sup> on top of the gels. We let the cells  
406 adhere for 1 day and then we filled the dishes with 2 ml of culture medium. The medium was  
407 changed every 2 days.

408

### 409 **Bacterial strains and culture conditions**

410 A list of the strains and plasmids is provided in **Table S1**. All strains were grown in LB  
411 medium at 37°C. Deletion of the *V. cholerae* genes *rbmA* and *bap1* were generated by mating a  
412 parental A1552 *V. cholerae* strain, rugose variant, with *E. coli* S17 strains harboring the  
413 deletion constructs according to previously published protocols (46). *P.aeruginosa* strains  
414 (PAO1 parental strain) are all constitutively expressing GFP (*attTn7::miniTn7T2.1-Gm-*  
415 *GW::PA1/04/03::GFP*).

416

### 417 **Infection of tissue-engineered epithelia by *Vibrio cholerae***

418 *V. cholerae* was grown in LB medium at 37°C to mid-exponential phase (OD 0.3-0.6).  
419 Bacteria were washed 3 times by centrifugation and resuspension in Dulbecco's phosphate-  
420 buffered saline (D-PBS). The cultures were then diluted to an optical density of 10<sup>-7</sup> and  
421 filtered (5.00 µm-pore size filters, Millex) to ensure the removal of large bacterial clumps,  
422 thereby isolating planktonic cells. This ensured that biofilms growing on epithelia formed  
423 from single cells. We loaded 200 µL of diluted culture on top of Caco-2 or MDCK cells that  
424 were cultured for 1 to 7 days post-confluence on collagen/Matrigel gels. Bacteria were  
425 allowed to adhere to the surface for 20 minutes, after which cells were rinsed two times with  
426 D-PBS.

427 For the implementation of the flow on top of Caco-2 cells, we prepared a circular slab of  
428 PDMS with the same dimensions as the dish. We punched 1mm inlet and outlet ports in this  
429 PDMS slab. We then glued it to the rim of the dish, where no cells are present. We then  
430 connected the inlet port to a disposable syringe (BD Plastipak) filled with culture medium  
431 using a 1.09 mm outer diameter polyethylene tube (Instech) and a 27G blunt needle  
432 (Instech). The syringes were mounted onto a syringe pump (KD Scientific) positioned inside  
433 a CO<sub>2</sub> incubator at 37°C. The volume flow rate was set to 50 µL·min<sup>-1</sup>.

434 For stationary biofilm growth on MDCK cells, the glass bottom dishes were filled with 2  
435 mL of culture medium and were incubated at 37°C in a CO<sub>2</sub> incubator.

436

### 437 **Fabrication of PEG hydrogels and mechanical characterization**

438 To generate PEG hydrogels films we prepared solutions of M9 minimal medium containing  
439 poly(ethylene glycol) diacrylate (PEGDA) as the precursor and lithium phenyl-2,4,6-  
440 trimethylbenzoylphosphinate (LAP, Tokyo Chemical Industries) as the photoinitiator.  
441 Molecular weight and concentration of PEGDA were tuned to obtain hydrogels with different  
442 stiffnesses (**Table S2**), while the concentration of LAP is kept constant at 2 mM.

443 To incorporate fluorescent microparticles into the PEG hydrogels, we modified the original  
444 solution by substituting 2  $\mu$ L of M9 medium with 2  $\mu$ L of red fluorescent particles solution  
445 (ThermoFischer, FluoSpheres, Carboxylate-modified Microspheres, 0.1  $\mu$ m diameter, 2%  
446 solids, F8887).

447 To prepare the samples for mechanical characterization, we filled PDMS wells (5 mm  
448 diameter, 4 mm height) with the hydrogel solution. We covered the wells with a coverslip and  
449 we let them polymerize in a UV transilluminator (Bio-Rad Universal Hood II) for 5 minutes.  
450 The resulting hydrogel cylinders were immersed in M9 overnight and tested with a  
451 rheometer (TA instruments) in compression mode, at a deformation rate of 10  $\mu$ m/s.  
452 Beforehand, the diameter of the cylinders was measured with a digital caliper, while the  
453 height of the cylinder was defined as the gap distance at which the force starts differing from  
454 zero. The elastic modulus corresponds to the slope of the linear fit of the stress-strain curves  
455 in the range of 15% strain. The final modulus is the average modulus of 3 replicates.

456

#### 457 **Fabrication of thin PEG hydrogel layers and implementation with PDMS microfluidic** 458 **chip**

459 We fabricated microfluidic chips following standard soft lithography techniques. More  
460 specifically, we designed 2 cm-long, 2 mm-wide channels in Autodesk AutoCAD and printed  
461 them on a soft plastic photomask. We then coated silicon wafers with photoresist (SU8  
462 2150, Microchem), with a thickness of 350  $\mu$ m. The wafer was exposed to UV light through  
463 the mask and developed in PGMEA (Sigma-Aldrich) in order to produce a mold. PDMS  
464 (Sylgard 184, Dow Corning) was subsequently casted on the mold and cured at 70 °C  
465 overnight. After cutting out the chips, we punched 1 mm inlet and outlet ports. We finally  
466 punched a 3 mm hole right downstream of the inlet port. This hole, after being covered with  
467 a PDMS piece, acts as a bubble trap.

468 To obtain thin and flat hydrogel layers, a drop of about 80  $\mu$ L of the hydrogel solution was  
469 sandwiched between two coverslips and incubated in the UV transilluminator for 5 minutes  
470 to allow gelation. The bottom coverslip (25x60 mm Menzel Gläser) was cleaned with  
471 isopropanol and MilliQ water, while the upper one (22x40 mm Marienfeld) was functionalized  
472 with 3-(Trimethoxysilyl)propyl methacrylate (Sigma-Aldrich) following the standard  
473 procedure. In short, cleaned coverslips were immersed in a 200 mL solution of ethanol  
474 containing 1 mL of the reagent and 6ml of dilute acetic acid (1:10 glacial acetic acid:water)  
475 for 5 minutes. They were subsequently rinsed in ethanol and dried. This functionalization  
476 enables the covalent linkage of the hydrogel to the coverslip.

477 Right after polymerization, the coverslips were separated using a scalpel and thus  
478 exposing the hydrogel film surface. We then positioned the PDMS microfluidic chip on top of  
479 the hydrogel film. This results in a reversible, but sufficiently strong bond between the  
480 hydrogel and the PDMS, allowing us to use the chips under flow without leakage for several  
481 days. The assembled chips were filled with M9 to maintain the hydrogel hydrated.

482

#### 483 **Biofilm growth in microfluidic chambers**

484 All *V. cholerae* and *P. aeruginosa* strains were grown in LB medium at 37°C until mid-  
485 exponential phase (OD 0.3-0.6). The cultures were diluted to an optical density of  $10^{-3}$  and  
486 subsequently filtered (5.00  $\mu$ m-pore size filters, Millex) to ensure the removal of large  
487 bacterial clumps. We then loaded 6.5  $\mu$ L of the diluted bacterial culture in the channels, from  
488 the outlet port. We let them adhere for 20 minutes before starting the flow. We connected  
489 the inlet port to a disposable LB-filled syringe (BD Plastipak) mounted onto a syringe pump  
490 (KD Scientific), using a 1.09 mm outer diameter polyethylene tube (Instech) and a 27G  
491 needle (Instech). For all conditions, the volume flow rate was 10  $\mu$ L $\cdot$ min $^{-1}$ , which

492 corresponds to a mean flow speed of about  $0.25 \text{ mm}\cdot\text{s}^{-1}$  inside the channels. The biofilms  
493 were grown at  $25^\circ\text{C}$ .

494

#### 495 **Staining procedures**

496 Caco-2 cells and MDCK cells were incubated for 20 minutes in a  $10 \mu\text{M}$  solution of  
497 CellTracker Orange CMRA (Invitrogen, C34551) and washed with DPBS before seeding the  
498 bacteria.

499 Since *V. cholerae* strains were not constitutively fluorescent, biofilms were incubated for  
500 20 minutes with a  $10 \mu\text{M}$  solution of SYTO9 (Invitrogen, S34854) and washed with M9  
501 minimal medium before visualization. This results in double staining of epithelial cells in the  
502 case of infection experiments.

503

#### 504 **Visualization**

505 For all visualizations, we used an Nikon Eclipse Ti2-E inverted microscope coupled with a  
506 Yokogawa CSU W2 confocal spinning disk unit and equipped with a Prime 95B sCMOS  
507 camera (Photometrics). For low magnification images, we used a 20x water immersion  
508 objective with N.A. of 0.95, while for all the others we used a 60x water immersion objective  
509 with a N.A. of 1.20. We used Imaris (Bitplane) for three-dimensional rendering of z-stack  
510 pictures and Fiji for the display of all the other images.

511 To obtain the deformation profiles, z-stacks of the hydrogel containing fluorescent  
512 microparticles were performed every  $0.5 \mu\text{m}$ , while a brightfield image of the base of the  
513 biofilm was taken to allow measurement of the diameter of the biofilm. For the visualization  
514 of the full biofilm, z-stacks of the samples were taken every 2-3  $\mu\text{m}$ . For timelapse  
515 experiments, biofilms were imaged as soon as the flow was started, while for all the other  
516 experiments biofilms were imaged between 10 and 24 h post-seeding.

517

#### 518 **Image analysis and computation of deformation profiles**

519 Starting from confocal imaging pictures of the microparticle-containing hydrogel, we aimed at  
520 identifying the gel surface and extracting quantitative information about its deformation  
521 induced by the biofilms. In most cases, we used an automated data analysis pipeline as  
522 described below. To get an average profile of the deformation caused by the biofilms, we  
523 performed a radial reslice in Fiji over 180 degrees around the center of the deformation (one  
524 degree per slice). We then performed an average intensity projection of the obtained stack.  
525 To calculate the diameter of the biofilm, we averaged 4 measurements of the biofilm  
526 diameter taken at different angles. The resliced images were then imported in Matlab  
527 R2017a (Mathworks) as two-dimensional (x-y) matrices of intensities. In these images, the  
528 surface was consistently brighter than the rest of the gel. Therefore, we identified the surface  
529 profile as the pixels having the maximal intensity in each column of the matrix. Note that the  
530 bottom of the gel sometimes also comprised bright pixels that introduced noise in the profile.  
531 To reduce this problem, we thus excluded 20 rows at the bottom of each image ( $\sim 3.7 \mu\text{m}$ ).  
532 We then calculated the baseline position of our gel – namely, the height of the non-deformed  
533 portion of the gel. In our pictures, this corresponds to the height at the left and right  
534 extremities of the profile. Therefore, we defined the baseline as the average of the first 50  
535 and last 50 pixels of the profile ( $\sim 9 \mu\text{m}$  on each side of the profile). We then offset the whole  
536 picture so that the baseline position corresponded to  $y = 0$ . We undersampled the extracted  
537 surface profiles to further reduce noise, by keeping only the maximal y value over windows  
538 of 40 pixels. Finally, we fitted a smoothing spline to the undersampled profile using the built-  
539 in *fit* function in Matlab, with a smoothing parameter value of 0.9999.

540 To quantify the deformation that biofilms induced on the hydrogel, we measured the  
541 amplitude ( $\delta_{max}$ ) of the deformed peak and its full width at half maximum ( $\lambda$ ). First, we  
542 evaluated the fitted profile described above at a range of points spanning the whole width of  
543 the picture and spaced by  $0.0005 \mu\text{m}$ . We identified the maximal value of the profile at these  
544 points, which corresponds to the amplitude of the peak  $\delta_{max}$  (with respect to the baseline,  
545 which is defined as  $y = 0$ ). We then split the profile in two: one part on the left of the  
546 maximum, and one part on its right. On each side, we found the point on the profile whose y



547 value was the closest to  $0.5 \cdot \delta_{max}$  using the Matlab function *knnsearch*. We then calculated  
548 the distance between their respective x values, which corresponds to the  $\lambda$  of the deformed  
549 peak. Our data analysis program also included a quality control feature, which prompted the  
550 user to accept or reject the computed parameters. When imaging quality was insufficient to  
551 ensure proper quantification with our automated pipeline, we measured the deformation  
552 manually in Fiji.

### 553 **Digital volume correlation and traction force microscopy**

554 We performed particle tracking to measure local deformations and ultimately compute stress  
555 and traction forces within hydrogels as biofilms grew. To do this, we performed timelapse  
556 visualizations of the hydrogel during the formation of a biofilm at high spatial resolution with  
557 a 60X, NA 0.95 water immersion objective. We thus generated  $200 \mu\text{m} \times 200 \mu\text{m} \times 25 \mu\text{m}$   
558 (50 stacks of  $1200 \times 1200$  pixels) volumes at 14 different time points. These images were  
559 subsequently registered to eliminate drift using the Correct 3D Drift function in Fiji. To  
560 compute local material deformations which we anticipated to generate large strains, we used  
561 an iterative Digital Volume Correlation (DVC) scheme (16). These were performed with  
562  $128 \times 128 \times 64$  voxel size in cumulative mode, meaning deformations are calculated by  
563 iterations between each time point over the whole 4D timelapse, rather than directly from the  
564 reference initial image. The DVC code computes material deformation fields in 3D which we  
565 subsequently use as input for the associated large deformation traction force microscopy  
566 (TFM) algorithm (16). The TFM calculates stress and strain fields given the material's Young  
567 modulus ( $E = 38 \text{ kPa}$  in our case) to ultimately generate a traction force map at the hydrogel  
568 surface.

569  
570

571 **Table S1.** Plasmids and strains used in this study

| Strain or plasmid                                   | Relevant genotype                                                                             | Source     |
|-----------------------------------------------------|-----------------------------------------------------------------------------------------------|------------|
| pFY_113                                             | plasmid for generation of in-frame <i>rbmA</i> deletion mutants                               | (47)       |
| pFY_330                                             | plasmid for generation of in-frame <i>bap1</i> deletion mutants                               | (47)       |
| <i>V. cholerae</i> O1 El Tor A1552 ( <i>Vc</i> WT*) | rugose variant                                                                                | (48)       |
| <i>V. cholerae</i> $\Delta$ <i>rbmA</i>             | in frame deletion of <i>Rbma</i> in rugose backgrounds                                        | This study |
| <i>V. cholerae</i> $\Delta$ <i>bap1</i>             | in frame deletion of <i>Bap1</i> in rugose backgrounds                                        | This study |
| PAO1 WT                                             | wild-type, <i>Gm</i> <sup>r</sup>                                                             | (49)       |
| PAO1 $\Delta$ <i>wspF</i> (PAO1 WT*)                | in frame deletions of <i>WspF</i> , <i>Gm</i> <sup>r</sup>                                    | (50)       |
| PAO1 $\Delta$ <i>wspF</i> $\Delta$ <i>pel</i>       | in frame deletions of <i>WspF</i> , <i>PelA</i> genes, <i>Gm</i> <sup>r</sup>                 | (50)       |
| PAO1 $\Delta$ <i>wspF</i> $\Delta$ <i>psl</i>       | in frame deletions of <i>WspF</i> , <i>PsIBCD</i> genes, <i>Gm</i> <sup>r</sup>               | (50)       |
| PAO1 $\Delta$ <i>wspF</i> $\Delta$ <i>cdrA</i>      | in frame deletions of <i>WspF</i> , <i>PsIBCD</i> , <i>cdrA</i> genes, <i>Gm</i> <sup>r</sup> | (51)       |

572  
573

574 **Table S2.** Molecular weight and concentrations of the precursors used for the generation of  
575 the hydrogels and resulting elastic modulus

| Precursor                    | Concentration wt/vol | Modulus kPa  |
|------------------------------|----------------------|--------------|
| PEGDA MW 10000 (Biochempeg)  | 10%                  | 12.1 ± 0.8   |
| PEGDA MW 6000 (Biochempeg)   | 10%                  | 38.3 ± 1.0   |
| PEGDA MW 3400 (Biochempeg)   | 10%                  | 30.9 ± 2.0   |
| PEGDA MW 700 (Sigma-Aldrich) | 15%                  | 203.3 ± 13.7 |

576

577

578

579

580

581

582 **References and notes**

583

- 584 1. H. C. Flemming, *et al.*, Biofilms: An emergent form of bacterial life. *Nat. Rev.*  
585 *Microbiol.* **14**, 563–575 (2016).
- 586 2. G. O’Toole, H. B. Kaplan, R. Kolter, Biofilm Formation as Microbial Development.  
587 *Annu. Rev. Microbiol.* **54**, 49–79 (2000).
- 588 3. H. C. Flemming, J. Wingender, The biofilm matrix. *Nat. Rev. Microbiol.* **8**, 623–633  
589 (2010).
- 590 4. T.-F. C. Mah, G. A. O’Toole, Mechanisms of biofilm resistance to antimicrobial agents.  
591 *Trends Microbiol.* **9**, 34–39 (2001).
- 592 5. R. M. Donlan, J. W. Costerton, Biofilms: Survival mechanisms of clinically relevant  
593 microorganisms. *Clin. Microbiol. Rev.* **15**, 167–193 (2002).
- 594 6. T. Bjarnsholt, *et al.*, The in vivo biofilm. *Trends Microbiol.* **21**, 466–474 (2013).
- 595 7. R. De Weirdt, T. Van De Wiele, Micromanagement in the gut: Microenvironmental  
596 factors govern colon mucosal biofilm structure and functionality. *npj Biofilms*  
597 *Microbiomes* **1**, 15026 (2015).
- 598 8. C. Douarche, J. M. Allain, E. Raspaud, Bacillus subtilis Bacteria Generate an Internal  
599 Mechanical Force within a Biofilm. *Biophys. J.* **109**, 2195–2202 (2015).
- 600 9. N. Rivera-Yoshida, J. A. Arias Del Angel, M. Benítez, Microbial multicellular  
601 development: mechanical forces in action. *Curr. Opin. Genet. Dev.* **51**, 37–45 (2018).
- 602 10. Y. F. Dufrêne, A. Persat, Mechanobiology: how bacteria sense and respond to  
603 forces. *Nat. Rev. Microbiol.*, 1–14 (2020).
- 604 11. M. Trejo, *et al.*, Elasticity and wrinkled morphology of Bacillus subtilis pellicles. *Proc.*  
605 *Natl. Acad. Sci. U. S. A.* **110**, 2011–2016 (2013).

- 606 12. J. Yan, *et al.*, Mechanical instability and interfacial energy drive biofilm  
607 morphogenesis. *Elife* **8** (2019).
- 608 13. R. Hartmann, *et al.*, Emergence of three-dimensional order and structure in growing  
609 biofilms. *Nat. Phys.* **15**, 251–256 (2019).
- 610 14. F. Beroz, *et al.*, Verticalization of bacterial biofilms. *Nat. Phys.* **14**, 954–960 (2018).
- 611 15. M. C. Duvernoy, *et al.*, Asymmetric adhesion of rod-shaped bacteria controls  
612 microcolony morphogenesis. *Nat. Commun.* **9**, 25–28 (2018).
- 613 16. J. Toyjanova, *et al.*, High resolution, large deformation 3D traction force microscopy.  
614 *PLoS One* **9**, e90976 (2014).
- 615 17. J. Yan, *et al.*, Bacterial Biofilm Material Properties Enable Removal and Transfer by  
616 Capillary Peeling. *Adv. Mater.* **30**, 1804153 (2018).
- 617 18. J. K. Teschler, *et al.*, Living in the matrix: assembly and control of *Vibrio cholerae*  
618 biofilms. *Nat. Rev. Microbiol.* **13**, 255–268 (2015).
- 619 19. L. K. Jennings, *et al.*, Pel is a cationic exopolysaccharide that cross-links extracellular  
620 DNA in the *Pseudomonas aeruginosa* biofilm matrix. *Proc. Natl. Acad. Sci. U. S. A.*  
621 **112**, 11353–11358 (2015).
- 622 20. K. Kovach, *et al.*, Evolutionary adaptations of biofilms infecting cystic fibrosis lungs  
623 promote mechanical toughness by adjusting polysaccharide production. *npj Biofilms*  
624 *Microbiomes* **3** (2017).
- 625 21. K. M. Colvin, *et al.*, The Pel and Psl polysaccharides provide *Pseudomonas*  
626 *aeruginosa* structural redundancy within the biofilm matrix. *Environ. Microbiol.* **14**,  
627 1913–28 (2012).
- 628 22. E. R. Rojas, K. C. Huang, Regulation of microbial growth by turgor pressure. *Curr.*  
629 *Opin. Microbiol.* **42**, 62–70 (2018).

- 630 23. G. Charras, A. S. Yap, Tensile Forces and Mechanotransduction at Cell–Cell  
631 Junctions. *Curr. Biol.* **28**, R445–R457 (2018).
- 632 24. D. E. Discher, P. Janmey, Y. L. Wang, Tissue cells feel and respond to the stiffness of  
633 their substrate. *Science (80-. )*. **310**, 1139–1143 (2005).
- 634 25. S. Lee, X. Tong, F. Yang, The effects of varying poly(ethylene glycol) hydrogel  
635 crosslinking density and the crosslinking mechanism on protein accumulation in three-  
636 dimensional hydrogels. *Acta Biomater.* **10**, 4167–4174 (2014).
- 637 26. C. Y. Wang, On the Buckling of a Circular Plate on an Elastic Foundation. *J. Appl.*  
638 *Mech.* **72**, 795–796 (2005).
- 639 27. A. D. Tischler, A. Camilli, Cyclic diguanylate regulates *Vibrio cholerae* virulence gene  
640 expression. *Infect. Immun.* **73**, 5873–82 (2005).
- 641 28. A. R. Harris, *et al.*, Characterizing the mechanics of cultured cell monolayers. *Proc.*  
642 *Natl. Acad. Sci. U. S. A.* **109**, 16449–16454 (2012).
- 643 29. S. Timoshenko, J. M. Gere, *Theory of elastic stability* (Dover Publications, 2009)  
644 (December 6, 2019).
- 645 30. Q. Wang, X. Zhao, A three-dimensional phase diagram of growth-induced surface  
646 instabilities. *Sci. Rep.* **5**, 1–10 (2015).
- 647 31. F. H. Yildiz, G. K. Schoolnik, *Vibrio cholerae* O1 El Tor: Identification of a gene cluster  
648 required for the rugose colony type, exopolysaccharide production, chlorine  
649 resistance, and biofilm formation. *Proc. Natl. Acad. Sci. U. S. A.* **96**, 4028–4033  
650 (1999).
- 651 32. D. O. Serra, G. Klauck, R. Hengge, Vertical stratification of matrix production is  
652 essential for physical integrity and architecture of macrocolony biofilms of *Escherichia*  
653 *coli*. *Environ. Microbiol.* **17**, 5073–5088 (2015).

- 654 33. J. N. Wilking, *et al.*, Liquid transport facilitated by channels in *Bacillus subtilis* biofilms.  
655 *Proc. Natl. Acad. Sci.* **110**, 848–852 (2013).
- 656 34. E. S. Gloag, G. K. German, P. Stoodley, D. J. Wozniak, Viscoelastic properties of  
657 *Pseudomonas aeruginosa* variant biofilms. *Sci. Rep.* **8**, 1–11 (2018).
- 658 35. M. Starkey, *et al.*, *Pseudomonas aeruginosa* Rugose small-colony variants have  
659 adaptations that likely promote persistence in the cystic fibrosis lung. *J. Bacteriol.* **191**,  
660 3492–3503 (2009).
- 661 36. J. Yan, A. G. Sharo, H. A. Stone, N. S. Wingreen, B. L. Bassler, *Vibrio cholerae*  
662 biofilm growth program and architecture revealed by single-cell live imaging. *Proc.*  
663 *Natl. Acad. Sci. U. S. A.* **113**, e5337–e5343 (2016).
- 664 37. J. A. Lichter, *et al.*, Substrata mechanical stiffness can regulate adhesion of viable  
665 bacteria. *Biomacromolecules* **9**, 1571–1578 (2008).
- 666 38. K. W. Kolewe, S. R. Peyton, J. D. Schiffman, Fewer Bacteria Adhere to Softer  
667 Hydrogels. *ACS Appl. Mater. Interfaces* **7**, 19562–19569 (2015).
- 668 39. F. Song, D. Ren, Stiffness of cross-linked poly(dimethylsiloxane) affects bacterial  
669 adhesion and antibiotic susceptibility of attached cells. *Langmuir* **30**, 10354–10362  
670 (2014).
- 671 40. A. R. Harris, *et al.*, Characterizing the mechanics of cultured cell monolayers. *Proc.*  
672 *Natl. Acad. Sci. U. S. A.* **109**, 16449–16454 (2012).
- 673 41. A. Swidsinski, *et al.*, Presence of a Polymicrobial Endometrial Biofilm in Patients with  
674 Bacterial Vaginosis. *PLoS One* **8**, e53997 (2013).
- 675 42. L. Hardy, *et al.*, A fruitful alliance: The synergy between *Atopobium vaginae* and  
676 *Gardnerella vaginalis* in bacterial vaginosis-associated biofilm. *Sex. Transm. Infect.*  
677 **92**, 487–491 (2016).

- 678 43. P. Engel, K. D. Bartlett, N. A. Moran, The Bacterium *Frischella perrara* Causes Scab  
679 Formation in the Gut of its Honeybee Host. *MBio* **6**, e00193-15 (2015).
- 680 44. C. Chelakkot, J. Ghim, S. H. Ryu, Mechanisms regulating intestinal barrier integrity  
681 and its pathological implications. *Exp. Mol. Med.* **50**, 1–9 (2018).
- 682 45. M. J. Pestrak, *et al.*, *Pseudomonas aeruginosa* rugose small-colony variants evade  
683 host clearance, are hyper-inflammatory, and persist in multiple host environments.  
684 *PLOS Pathog.* **14**, e1006842 (2018).
- 685 46. J. C. N. Fong, K. Karplus, G. K. Schoolnik, F. H. Yildiz, Identification and  
686 characterization of RbmA, a novel protein required for the development of rugose  
687 colony morphology and biofilm structure in *Vibrio cholerae*. *J. Bacteriol.* **188**, 1049–59  
688 (2006).
- 689 47. V. Berk, *et al.*, Molecular architecture and assembly principles of *Vibrio cholerae*  
690 biofilms. *Science* **337**, 236–9 (2012).
- 691 48. F. H. Yildiz, X. S. Liu, A. Heydorn, G. K. Schoolnik, Molecular analysis of rugosity in a  
692 *Vibrio cholerae* O1 El Tor phase variant. *Mol. Microbiol.* **53**, 497–515 (2004).
- 693 49. J. W. Hickman, D. F. Tifrea, C. S. Harwood, A chemosensory system that regulates  
694 biofilm formation through modulation of cyclic diguanylate levels. *Proc. Natl. Acad.*  
695 *Sci. U. S. A.* **102**, 14422–7 (2005).
- 696 50. M. T. Rybtke, *et al.*, Fluorescence-based reporter for gauging cyclic di-GMP levels in  
697 *Pseudomonas aeruginosa*. *Appl. Environ. Microbiol.* **78**, 5060–9 (2012).
- 698 51. M. Rybtke, *et al.*, The LapG protein plays a role in *Pseudomonas aeruginosa* biofilm  
699 formation by controlling the presence of the CdrA adhesin on the cell surface.  
700 *Microbiologyopen* **4**, 917–930 (2015).

701
